# Supplementary material for: Kyoto global consensus report on Helicobacter pylori gastritis
Source: PubMed Central journal article supplement — Gut. 2015 Jul 17;64(9):1353–67. doi: 10.1136/gutjnl-2015-309252 (PMC4552923; doi:10.1136/gutjnl-2015-309252), 2015-07-17
Supplement: gutjnl-2015-309252-s1.pdf [file gutjnl-2015-309252-s1.pdf]

**Supplementary Table 1. Grade of Recommendation**

| Grade of Recommendation                          | Benefit versus Risks and Burden                          | Methodological Quality of Supporting Evidence                                                                                                                   | Interpretation                                                                                         | Implication                                                                                                                                                                                                                                                                                                                                            |
|--------------------------------------------------|----------------------------------------------------------|-----------------------------------------------------------------------------------------------------------------------------------------------------------------|--------------------------------------------------------------------------------------------------------|--------------------------------------------------------------------------------------------------------------------------------------------------------------------------------------------------------------------------------------------------------------------------------------------------------------------------------------------------------|
| Strong recommendation: high-quality evidence     | Benefits clearly outweigh risks and burden or vice versa | RCTs without important limitations of overwhelming evidence from observational studies                                                                          | Strong recommendation: can apply to most patients in most circumstances                                | For patients, most would want the recommended course of action and only a small proportion would not; a person should request discussion if the intervention was not offered.<br>For clinicians, most patients should receive the recommended course of action.<br>For policymakers, the recommendation can be adopted as a policy in most situations. |
| Strong recommendation: moderate-quality evidence |                                                          | RCTs with important limitations (inconsistent results, methodological flaws, indirect or imprecise) or exceptionally strong evidence from observational studies | without reservation                                                                                    |                                                                                                                                                                                                                                                                                                                                                        |
| Strong recommendation: low-quality evidence      |                                                          | Observational studies or case series                                                                                                                            | Strong recommendation, but may change when higher quality evidence becomes available                   |                                                                                                                                                                                                                                                                                                                                                        |
| Weak recommendation: high-quality evidence       | Benefits closely balanced with risks and burden          | RCTs without important limitations or overwhelming evidence from observational studies                                                                          | Weak recommendation; best action may differ depending on circumstances or patients' or societal values | For patients, most would want the recommended course of action but some would not-a decision may depend on an individual's circumstances.<br>For clinicians, different choices will                                                                                                                                                                    |
| Weak recommendation: moderate-quality evidence   |                                                          | RCTs with important limitations (inconsistent results, methodological flaws, indirect, or imprecise) or exceptionally                                           |                                                                                                        |                                                                                                                                                                                                                                                                                                                                                        |

|                                           |                                                                                                                  |                                                  |                                                                                   |                                                                                                                                                                                                                                                             |
|-------------------------------------------|------------------------------------------------------------------------------------------------------------------|--------------------------------------------------|-----------------------------------------------------------------------------------|-------------------------------------------------------------------------------------------------------------------------------------------------------------------------------------------------------------------------------------------------------------|
|                                           |                                                                                                                  | strong evidence from observational studies       |                                                                                   | be appropriate for different patients,                                                                                                                                                                                                                      |
| Weak Recommendation: low-quality evidence | Uncertainty in the estimates of benefits, risks, and burden; benefits, risks, and burden may be closely balanced | Observational studies or case series             | Very weak recommendations; other alternatives may be equally reasonable           | and a management decision consistent with a patient's values, preferences, and circumstances should be reached. For policymakers, policymaking will require substantial debate and involvement of many stakeholders.                                        |
| Insufficient                              | Balance of benefits and risks cannot be determined                                                               | Evidence is conflicting, poor quality or lacking | Insufficient evidence to recommend for or against routinely providing the service | For patients, decisions based on evidence from scientific studies cannot be made; for clinicians, decisions based on evidence from scientific studies cannot be made; for policymakers, decisions based on evidence from scientific studies cannot be made. |

Adopted from Quaseem A et al (10).

Abbreviation RCT: randomized controlled trial
