# Supplementary material for: Kyoto global consensus report on Helicobacter pylori gastritis
Source: PubMed Central journal article supplement — Gut. 2015 Jul 17;64(9):1353–67. doi: 10.1136/gutjnl-2015-309252 (PMC4552923; doi:10.1136/gutjnl-2015-309252), 2015-07-17
Supplement: gutjnl-2015-309252-s2.pdf [file gutjnl-2015-309252-s2.pdf]

**Supplementary Table 2. Quality of Evidence**

| Level | Quality  | Comments                                                                                                       |
|-------|----------|----------------------------------------------------------------------------------------------------------------|
| I     | High     | Further research is very unlikely to change our                                                                |
| II    | Moderate | Further research is likely to have an important impact on our confidence in the estimate of effect and may     |
| III   | Low      | Further research is very likely to have an important impact on our confidence in the estimate of effect and is |
| IV    | Very Low | An estimate of effect is very uncertain                                                                        |

Adopted from Atkins D et al (11).
