# Supplementary material for: Kyoto global consensus report onHelicobacter pylorigastritis
Source: HighWire-hosted journal article supplement (doi:10.1136/gutjnl-2015-309252), 2015-07-17
Supplement: gutjnl-2015-309252supp_table3.pdf [file gutjnl-2015-309252supp_table3.pdf]

**Supplementary Table 3. ICD-11 beta version, Joint Linearization for Mortality and Morbidity Linearization (as accessed in January 20th 2015) of gastritis(a) and duodenitis (b)**

<http://apps.who.int/classifications/icd11/browse/l-m/en#/>

**Please note that this table is continuously updated, and hence is subject to change. Also note that this classification is not authorized by WHO.**

**(a) Gastritis**

EC40 Gastritis

EC40.1 Drug-induced gastritis

EC40.2 Autoimmune gastritis

EC40.3 Stress-induced gastritis

Special forms of gastritis

EC50 Allergic gastritis

EC51 Gastritis due to biliary reflux

EC52 Lymphocytic gastritis

EC53 Ménétrier disease

EC54 Eosinophilic gastritis

EC5Y Other specified special forms of gastritis

EC5Z Special forms of gastritis, unspecified

EC40.5 Gastritis due to other diseases classified elsewhere

Gastritis due to external causes

EC60 Alcoholic gastritis

EC61 Radiation gastritis

EC62 Chemical gastritis

EC63 Gastritis due to other specified external cause

EC6Z Gastritis due to external causes, unspecified

Gastritis of unknown aetiology with specific endoscopic or pathological

Features

EC70 Superficial gastritis

EC70.1 Acute superficial gastritis

EC70.2 Chronic superficial gastritis

EC70.Y Other specified superficial gastritis

EC70.Z Superficial gastritis, unspecified

EC71 Acute haemorrhagic gastritis

EC72 Chronic atrophic gastritis

EC73 Metaplastic gastritis  
EC74 Granulomatous gastritis  
EC75 Hypertrophic gastritis  
EC7Y Other specified gastritis of unknown aetiology with specific  
endoscopic or pathological features  
EC7Z Gastritis of unknown aetiology with specific endoscopic or  
pathological features, unspecified  
EC40.8 Chronic gastritis, not elsewhere classified  
EC40.9 Acute gastritis, not elsewhere classified  
EC40.Y Other specified gastritis  
EC40.Z Gastritis, unspecified  
1A3H.1 *Helicobacter pylori*-induced gastritis  
1N2J Infectious gastritis  
1N2J.1 Gastric phlegmone  
1N2J.2 Bacterial gastritis  
1A3H.1 *Helicobacter pylori*-induced gastritis  
1N2J.3 Viral gastritis  
1N2J.4 Fungal gastritis  
1N2J.5 Parasitic gastritis  
1N2J.Y Other specified infectious gastritis

**(b) Duodenitis**

Duodenitis

ED70 Stress-induced duodenitis

Duodenitis due to external causes

ED80 Alcoholic duodenitis

ED81 Chemical duodenitis

ED82 Radiation duodenitis

ED83 Duodenitis due to other external causes

ED84 Drug-induced duodenitis

ED8Z Duodenitis due to external causes, unspecified

ED90 Special forms of duodenitis

ED90.1 Allergic duodenitis

ED90.2 Eosinophilic duodenitis

ED90.3 Lymphocytic duodenitis

ED90.Z Special forms of duodenitis, unspecified

ED91 Duodenitis due to other diseases, classified elsewhere

Duodenitis of unknown aetiology with specific endoscopic or pathologic features

EE00 Acute haemorrhagic duodenitis

EE01 Granulomatous duodenitis

EE0Z Duodenitis of unknown aetiology with specific endoscopic or pathologic features, unspecified

EE2Y Other specified duodenitis

EE2Z Duodenitis, unspecified

1A3H.5 *Helicobacter pylori*-induced duodenitis
